# Supplementary material for: Adsorption kinetics of NO2 gas on oxyfluorinated graphene film
Source: Royal Society of Chemistry journal article supplement (doi:10.1039/d2cp04926k), 2022-12-23
Supplement: d2cp04926k1.pdf [file d2cp04926k1.pdf]

## Supplementary Materials

# Adsorption kinetics of NO<sub>2</sub> gas on oxyfluorinated graphene film

Vitalii I. Sysoev<sup>a\*</sup>, Ruslan D. Yamaletdinov<sup>b</sup>, Pavel E. Plyusnin<sup>a</sup>, Alexander V. Okotrub<sup>a</sup> and Lyubov G. Bulusheva<sup>a</sup>

<sup>a</sup>Nikolaev Institute of Inorganic Chemistry, Siberian Branch of Russian Academy of Sciences, 3 Acad. Lavrentiev ave., Novosibirsk 630090, Russia.

<sup>b</sup>Boreskov Institute of Catalysis, Siberian Branch of Russian Academy of Sciences, 5, Ac. Lavrentieva ave., Novosibirsk 630090, Russia.

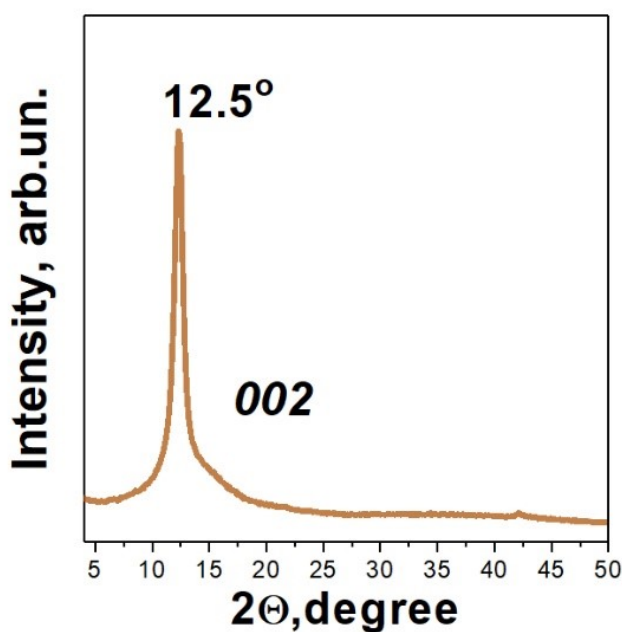

**Figure S1.** XRD pattern of oxyfluorinated graphite.

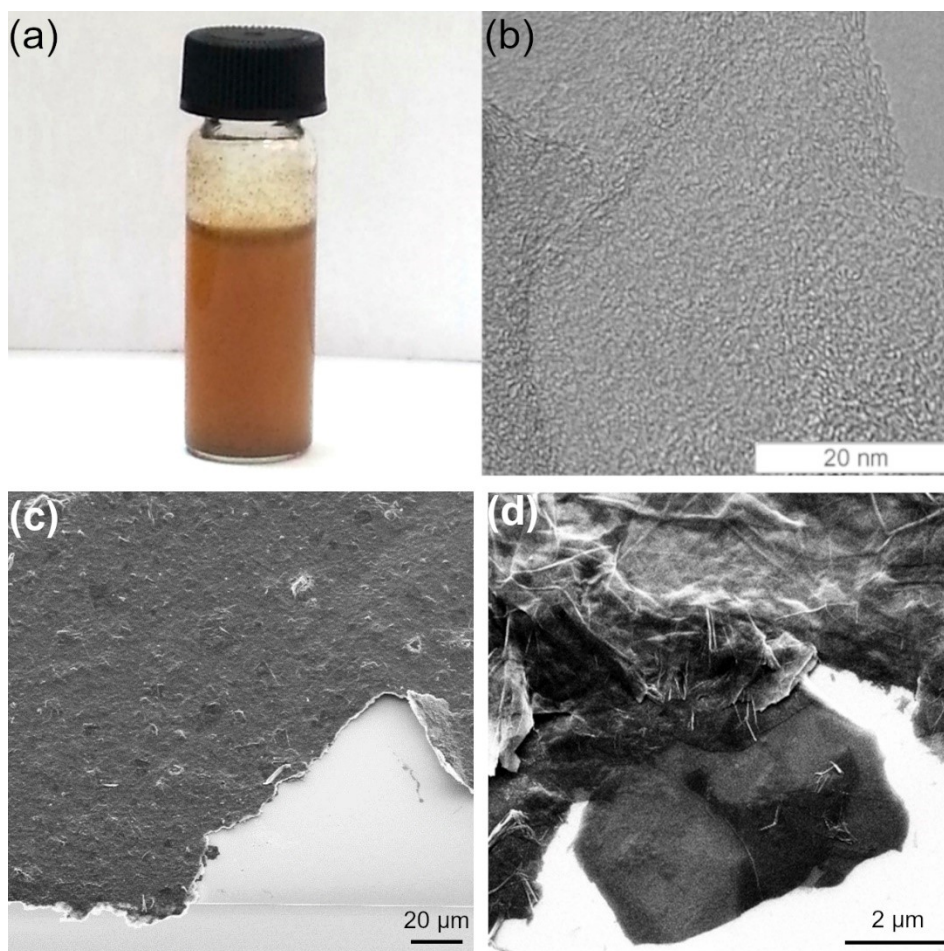

**Figure S2.** (a) OFG suspension in toluene, (b) high-resolution TEM image of OFG flake, (c,d) SEM images of OFG film deposited on SiO<sub>2</sub>/Si substrate.

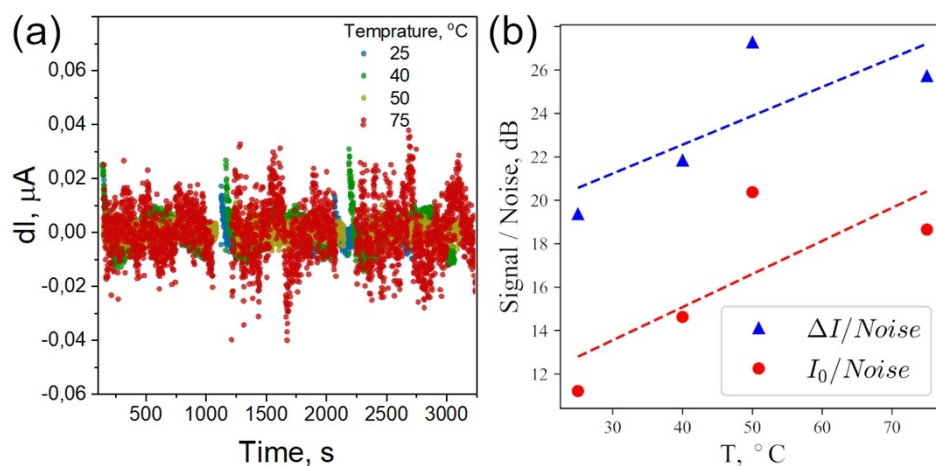

**Figure S3.** (a) Variation of noise level during  $\text{NO}_2$  cycling at different temperature; (b) Signal-to-noise ratio vs operation temperature of OFG sensor.

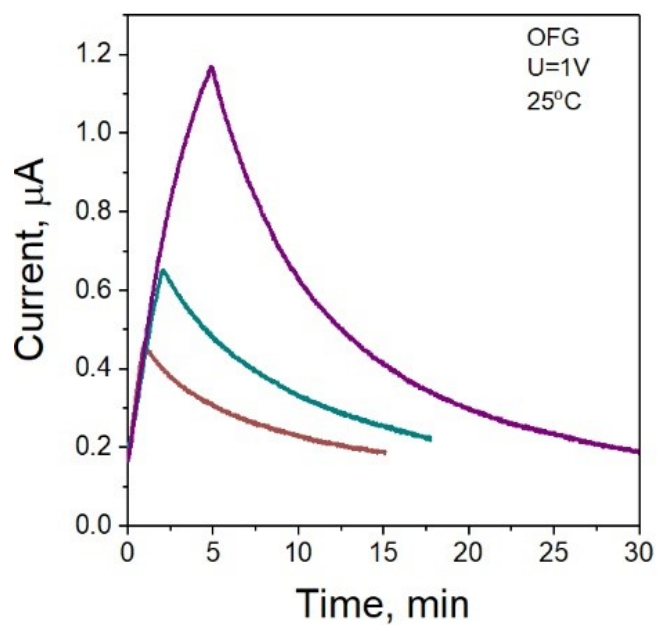

**Figure S4.** Responses of the OFG sensor to 100 ppm  $\text{NO}_2$  at exposure times 60, 180 and 300 s.
